# Supplementary material for: Experimental and theoretical study of intramolecular exchange in Ir2Rh2(CO)12and Ir4(CO)11(µ-SO2)
Source: Royal Society of Chemistry journal article supplement (doi:10.1039/b415147j), 2004-11-30
Supplement: b415147j.doc [file b415147j.doc]

Distances (Å) in ground and transition state geometries of Ir2Rh2(CO)12 (1)and
Ir4(CO)11(–SO2)(2) (~ 0 means < 0.004) from geometry optimizations using ADF

| Distances | Ground  state of **1** | Transition  state of **1** |   (Ts–Gs) | Distances | Ground  state of **2** | Transition  state of **2** |   (Ts–Gs) |
| --- | --- | --- | --- | --- | --- | --- | --- |
| Ir1–Rh2 | 2.80 | 2.83 | 0.03 | Ir1–Ir2 | 2.79 | 2.84 | 0.05 |
| Ir1–Ir3 | 2.76 | 2.74 | –0.02 | Ir1–Ir3 | 2.76 | 2.76 | 0.00 |
| Ir1–Rh4 | 2.80 | 2.71 | –0.090 | Ir1–Ir4 | 2.79 | 2.72 | –0.07 |
| Rh2–Ir3 | 2.75 | 2.83 | 0.08 | Ir2–Ir3 | 2.77 | 2.84 | 0.07 |
| Rh2–Rh4 | 2.80 | 3.06 | 0.26 | Ir2–Ir4 | 2.88 | 3.27 | 0.39 |
| Ir3–Rh4 | 2.75 | 2.71 | –0.04 | Ir3–Ir4 | 2.77 | 2.72 | –0.05 |
| Ir1–Cb1 | 2.10 | 3.14 | 1.04 | Ir1–Cb1 | 2.12 | 3.18 | 1.06 |
| Ir1–Cb2 | 2.10 | 1.90 | –0.20 | Ir1–Cb2 | 2.12 | 1.90 | –0.22 |
| Rh2–Cb1 | 2.13 | 1.93 | –0.20 | Ir2–Cb1 | 2.10 | 1.90 | –0.20 |
| Rh4–Cb2 | 2.13 | 3.04 | 0.91 | Ir4–Cb2 | 2.10 | 3.07 | 0.97 |
| Ir1–Cc | 1.92 | 1.92 | 0.00 | Ir1–Cc | 1.92 | 1.92 | 0.00 |
| Ir1–Cd | 1.90 | 1.93 | 0.03 | Ir1–Cd | 1.90 | 1.95 | 0.05 |
| Rh2–Cf1 | 1.91 | 1.95 | 0.04 | Ir2–Cf1 | 1.90 | 1.94 | 0.04 |
| Rh4–Cf2 | 1.91 | 1.92 | 0.01 | Ir4–Cf2 | 1.90 | 1.90 | 0.00 |
| Rh2–Ch1 | 1.9. | 1.95 | 0.02 | Ir2–Ch1 | 1.93 | 1.94 | 0.01 |
| Rh4–Ch2 | 1.93 | 1.91 | –0.02 | Ir4–Ch2 | 1.93 | 1.90 | –0.03 |
| Ir3–Ce | 1.93 | 1.92 | –0.01 | Ir3–Ce | 1.94 | 1.92 | –0.02 |
| Ir3–Cg1 | 1.92 | 1.90 | –0.02 | Ir3–Cg1 | 1.93 | 1.90 | –0.03 |
| Ir3–Cg2 | 1.92 | 1.93 | 0.01 | Ir3–Cg2 | 1.93 | 1.95 | 0.02 |
| Rh2–Ca | 2.12 | 2.13 | 0.01 | Ir2–S | 2.45 | 2.47 | 0.02 |
| Rh4–Ca | 2.12 | 2.02 | –0.10 | Ir4–S | 2.45 | 2.32 | –0.13 |
| Ca–O | 1.16 | 1.17 | 0.01 | S–O | 1.462 | 1.463 | 0.00 |
| Cb1–O | 1.16 | 1.14 | –0.02 | Cb1–O | 1.16 | 1.15 | –0.01 |
| Cb2–O | 1.16 | 1.15 | –0.01 | Cb2–O | 1.16 | 1.15 | –0.01 |
| Cc–O1) | 1.15 | 1.15 | 0.00 | Cc–O | 1.143 | 1.145 | 0.00 |

1) all C-O distance equal to Cc-O and (Ts–Gs) to 0.00

Distances (Å) in ground and transition state geometries of Ir2Rh2(CO)12 (1)and Ir4(CO)11(–SO2)(2) (~ 0 < 0.004) from geometry optimizations using Gaussian 03

| Distances | Ground  state of **1** | Transition  state of **1** |   (Ts–Gs) | Distances | Ground  state of **2** | Transition  state of **2** |   (Ts–Gs) |
| --- | --- | --- | --- | --- | --- | --- | --- |
| Ir1–Rh2 | 2.84 | 2.88 | 0.04 | Ir1–Ir2 | 2.825 | 2.867 | 0.042 |
| Ir1–Ir3 | 2.80 | 2.78 | -0.02 | Ir1–Ir3 | 2.803 | 2.796 | -0.007 |
| Ir1–Rh4 | 2.84 | 2.75 | -0.09 | Ir1–Ir4 | 2.825 | 2.773 | -0.052 |
| Rh2–Ir3 | 2.78 | 2.88 | 0.09 | Ir2–Ir3 | 2.793 | 2.867 | 0.074 |
| Rh2–Rh4 | 2.83 | 3.10 | 0.27 | Ir2–Ir4 | 2.976 | 3.522 | 0.546 |
| Ir3–Rh4 | 2.78 | 2.75 | -0.03 | Ir3–Ir4 | 2.793 | 2.773 | -0.020 |
| Ir1–Cb1 | 2.13 | 3.21 | 1.08 | Ir1–Cb1 | 2.138 | 3.232 | 1.094 |
| Ir1–Cb2 | 2.13 | 1.92 | -0.21 | Ir1–Cb2 | 2.138 | 1.921 | -0.217 |
| Rh2–Cb1 | 2.16 | 1.95 | -0.21 | Ir2–Cb1 | 2.093 | 1.899 | -0.194 |
| Rh4–Cb2 | 2.16 | 3.10 | 0.94 | Ir4–Cb2 | 2.093 | 3.057 | 0.964 |
| Ir1–Cc | 1.94 | 1.94 | 0.00 | Ir1–Cc | 1.949 | 1.948 | ~ 0 |
| Ir1–Cd | 1.92 | 1.96 | 0.04 | Ir1–Cd | 1.927 | 1.975 | 0.048 |
| Rh2–Cf1 | 1.92 | 1.97 | 0.05 | Ir2–Cf1 | 1.922 | 1.978 | 0.056 |
| Rh4–Cf2 | 1.92 | 1.93 | 0.01 | Ir4–Cf2 | 1.922 | 1.930 | 0.008 |
| Rh2–Ch1 | 1.95 | 1.97 | 0.02 | Ir2–Ch1 | 1.962 | 1.978 | 0.016 |
| Rh4–Ch2 | 1.95 | 1.93 | -0.02 | Ir4–Ch2 | 1.962 | 1.930 | -0.032 |
| Ir3–Ce | 1.95 | 1.94 | -0.01 | Ir3–Ce | 1.968 | 1.948 | -0.020 |
| Ir3–Cg1 | 1.95 | 1.92 | -0.03 | Ir3–Cg1 | 1.953 | 1.921 | -0.032 |
| Ir3–Cg2 | 1.95 | 1.96 | 0.01 | Ir3–Cg2 | 1.953 | 1.975 | 0.022 |
| Rh2–Ca | 2.14 | 2.15 | 0.01 | Ir2–S | 2.619 | 2.565 | -0.054 |
| Rh4–Ca | 2.14 | 2.04 | -0.10 | Ir4–S | 2.619 | 2.482 | -0.137 |
| Ca–O | 1.20 | 1.21 | 0.01 | S–O | 1.674 | 1.678 | ~ 0 |
| Cb1–O | 1.20 | 1.18 | -0.02 | Cb1–O | 1.202 | 1.182 | -0.020 |
| Cb2–O | 1.20 | 1.18 | -0.02 | Cb2–O | 1.202 | 1.180 | -0.022 |
| Cc–O1) | 1.18 | 1.18 | 0.00 | Cc–O | 1.178 | 1.177 | ~ 0 |

1. all C-O distance equal to Cc-O and (Ts–Gs) ~0

**Cartesian coordinates**

Ground state geometry of Ir4(SO2)(CO)11 ADF, BLYP, TZP

Ir 1.796747785 -0.089063823 0.000000000

Ir -0.424606594 0.794218209 1.438952562

Ir -0.536221955 -1.564575072 0.000000000

Ir -0.424606594 0.794218209 -1.438952562

O -2.270191323 3.122209269 0.000000000

O -3.475941727 0.927265608 0.000000000

C 3.047198102 -1.524689169 0.000000000

O 3.779633428 -2.403512067 0.000000000

C 3.059125700 1.358662838 0.000000000

O 3.818228780 2.214148551 0.000000000

C 0.014056612 2.552870984 2.099995381

O 0.296405963 3.575619652 2.521715867

C -1.531823122 0.230165762 2.873206982

O -2.191322597 -0.119490084 3.739895025

C -0.079294990 -2.730715491 1.467347831

O 0.177690763 -3.440819596 2.327532046

C -0.079294990 -2.730715491 -1.467347831

O 0.177690763 -3.440819596 -2.327532046

C -2.455673228 -1.824412868 0.000000000

O -3.561417664 -2.106198576 0.000000000

C -1.531823122 0.230165762 -2.873206982

O -2.191322597 -0.119490084 -3.739895025

C 0.014056612 2.552870984 -2.099995381

O 0.296405963 3.575619652 -2.521715867

C 1.392617824 -0.039354794 2.078229719

O 1.911055423 -0.308833881 3.083616301

C 1.392617824 -0.039354794 -2.078229719

O 1.911055423 -0.308833881 -3.083616301

S -2.213206912 1.660953409 0.000000000

Ground state geometry of Ir4(SO2)(CO)11 Gaussian03, BLYP, MWB

Ir 1.846684 -0.092670 0.000000

Ir -0.386324 0.790546 1.488447

Ir -0.535836 -1.567690 0.000000

Ir -0.386324 0.790546 -1.488447

O -2.416536 3.400813 0.000000

O -3.817131 0.966032 0.000000

C 3.092890 -1.563067 0.000000

O 3.828350 -2.483160 0.000000

C 3.157346 1.350361 0.000000

O 3.953678 2.217805 0.000000

C 0.022677 2.593988 2.143921

O 0.286194 3.660006 2.561268

C -1.519400 0.192774 2.921422

O -2.185196 -0.211615 3.804532

C -0.091729 -2.762131 1.480720

O 0.170045 -3.501189 2.360872

C -0.091729 -2.762131 -1.480720

O 0.170045 -3.501189 -2.360872

C -2.483705 -1.844909 0.000000

O -3.610580 -2.176793 0.000000

C -1.519400 0.192774 -2.921422

O -2.185196 -0.211615 -3.804532

C 0.022677 2.593988 -2.143921

O 0.286194 3.660006 -2.561268

C 1.440945 -0.028270 2.097728

O 1.978892 -0.301345 3.138103

C 1.440945 -0.028270 -2.097728

O 1.978892 -0.301345 -3.138103

S -2.327569 1.725962 0.000000Ir

Transition state geometry of Ir4(SO2)(CO)11 ADF, BLYP, TZP

Ir -1.052923448 0.094366206 -1.379487199

Ir 0.767718883 -1.589661103 0.000000000

Ir -1.052923448 0.094366206 1.379487199

Ir 0.678159603 1.678689400 0.000000000

O 3.215080409 0.295482146 -1.254663571

O 3.215080409 0.295482146 1.254663571

C -2.526994299 -1.126324834 -1.737532741

O -3.448204854 -1.756729348 -1.991842186

C -0.099352369 0.036376909 -3.043505134

O 0.471465882 0.006986161 -4.035223457

C 1.670478808 -2.367634633 -1.532276074

O 2.159539998 -2.881503860 -2.424799945

C 1.670478808 -2.367634633 1.532276074

O 2.159539998 -2.881503860 2.424799945

C -2.526994299 -1.126324834 1.737532741

O -3.448204854 -1.756729348 1.991842186

C -1.944029019 1.755838541 1.592205639

O -2.521968311 2.728093121 1.782139258

C -0.099352369 0.036376909 3.043505134

O 0.471465882 0.006986161 4.035223457

C 1.297649861 2.758486077 1.438092783

O 1.595040140 3.448353921 2.302496052

C 1.297649861 2.758486077 -1.438092783

O 1.595040140 3.448353921 -2.302496052

C -0.737436769 -2.748653298 0.000000000

O -1.542921151 -3.562636288 0.000000000

C -1.944029019 1.755838541 -1.592205639

O -2.521968311 2.728093121 -1.782139258

S 2.469504696 0.199470842 0.000000000

Transition state geometry of Ir4(SO2)(CO)11 Gaussian03, BLYP, MWB

Ir 0.978141 -0.078386 1.398452

Ir -0.978941 -1.638233 0.000000

Ir 0.978141 -0.078386 -1.398452

Ir -0.450729 1.844430 0.000000

O -3.347866 0.717895 1.415866

O -3.347866 0.717895 -1.415866

C 2.292856 -1.479797 1.851450

O 3.159869 -2.203679 2.191557

C -0.041614 0.021138 3.054869

O -0.643282 0.091239 4.064828

C -1.989596 -2.332780 1.551843

O -2.528601 -2.830501 2.467162

C -1.989596 -2.332780 -1.551843

O -2.528601 -2.830501 -2.467162

C 2.292856 -1.479797 -1.851450

O 3.159869 -2.203679 -2.191557

C 2.110210 1.458417 -1.623761

O 2.831599 2.373299 -1.823443

C -0.041614 0.021138 -3.054869

O -0.643282 0.091239 -4.064828

C -0.997202 2.992322 -1.451977

O -1.266269 3.719035 -2.340399

C -0.997202 2.992322 1.451977

O -1.266269 3.719035 2.340399

C 0.406544 -2.936490 0.000000

O 1.138604 -3.863752 0.000000

C 2.110210 1.458417 1.623761

O 2.831599 2.373299 1.823443

S -2.492516 0.433439 0.000000

Ground state geometry of Ir2Rh2(CO)12 ADF, BLYP, TZP

Ir 0.779763768 -1.432153439 0.000000000

Rh 0.406262634 0.906124827 -1.400905340

Ir -1.721826225 -0.266094273 0.000000000

Rh 0.406262634 0.906124827 1.400905340

C -1.326566560 -0.147646787 -2.059818685

C -1.326566560 -0.147646787 2.059818685

C 1.802894692 1.675376881 0.000000000

C 0.473178049 -2.631871816 -1.470446845

C 2.706982198 -1.354329219 0.000000000

C 0.473178049 -2.631871816 1.470446845

C 1.589012946 0.485752039 -2.835612728

C -0.143731648 2.617258608 -2.100954483

C -2.804189640 -1.823358440 0.000000000

C -3.168288463 0.989669027 0.000000000

C 1.589012946 0.485752039 2.835612728

C -0.143731648 2.617258608 2.100954483

O -1.778849458 -0.454061894 -3.086030997

O -1.778849458 -0.454061894 3.086030997

O 2.806898027 2.253115382 0.000000000

O 0.314145186 -3.365687309 -2.336056095

O 3.852393481 -1.341771941 0.000000000

O 0.314145186 -3.365687309 2.336056095

O 2.286568240 0.244651717 -3.708454104

O -0.444115406 3.614931321 -2.568599541

O -3.454132402 -2.766071159 0.000000000

O -4.040117018 1.730755395 0.000000000

O 2.286568240 0.244651717 3.708454104

O -0.444115406 3.614931321 2.568599541

Ground state geometry of Ir2Rh2(CO)12 Gaussian03, BLYP, MWB

Ir 0.78000 -1.43200 0.00000

Rh 0.40600 0.90600 -1.40100

Ir -1.72200 -0.26600 0.00000

Rh 0.40600 0.90600 1.40100

C -1.32700 -0.14800 -2.06000

C -1.32700 -0.14800 2.06000

C 1.80300 1.67500 0.00000

C 0.47300 -2.63200 -1.47000

C 2.70700 -1.35400 0.00000

C 0.47300 -2.63200 1.47000

C 1.58900 0.48600 -2.83600

C -0.14400 2.61700 -2.10100

C -2.80400 -1.82300 0.00000

C -3.16800 0.99000 0.00000

C 1.58900 0.48600 2.83600

C -0.14400 2.61700 2.10100

O -1.77900 -0.45400 -3.08600

O -1.77900 -0.45400 3.08600

O 2.80700 2.25300 0.00000

O 0.31400 -3.36600 -2.33600

O 3.85200 -1.34200 0.00000

O 0.31400 -3.36600 2.33600

O 2.28700 0.24500 -3.70800

O -0.44400 3.61500 -2.56900

O -3.45400 -2.76600 0.00000

O -4.04000 1.73100 0.00000

O 2.28700 0.24500 3.70800

O -0.44400 3.61500 2.56900

Transition state geometry of Ir2Rh2(CO)12 ADF, BLYP, TZP

Ir -0.550349 0.830192 -1.369896

Rh 1.744825 -0.098292 0.000000

Ir -0.550349 0.830192 1.369896

Rh -0.993095 -1.470227 0.000000

C 2.106188 1.798582 0.000000

C -2.431752 0.714929 1.550680

C 0.941265 -2.066818 0.000000

C -0.212422 2.708735 -1.676659

C -0.029445 0.089682 -3.060137

C -2.431752 0.714929 -1.550680

C 2.877265 -0.585022 -1.512212

C 2.877265 -0.585022 1.512212

C -0.212422 2.708735 1.676659

C -0.029445 0.089682 3.060137

C -1.579169 -2.592413 -1.435561

C -1.579169 -2.592413 1.435561

O 2.498951 2.873831 0.000000

O -3.564635 0.718654 1.742997

O 1.395206 -3.142099 0.000000

O -0.109363 3.829391 -1.897703

O 0.289841 -0.354799 -4.068101

O -3.564635 0.718654 -1.742997

O 3.582337 -0.823020 -2.375736

O 3.582337 -0.823020 2.375736

O -0.109363 3.829391 1.897703

O 0.289841 -0.354799 4.068101

O -1.954401 -3.257021 -2.288613

O -1.954401 -3.257021 2.288613

Transition state geometry of Ir2Rh2(CO)12 Gaussian03, BLYP, MWB

Ir 0.090639 -0.821654 1.387930

Rh 1.311395 1.380973 0.000000

Ir 0.090639 -0.821654 -1.387930

Rh -1.718664 0.709827 0.000000

C 2.819600 0.149585 0.000000

C -1.454166 -1.941674 -1.588667

C -0.575392 2.403911 0.000000

C 1.552338 -2.091043 1.710623

C 0.025078 0.104759 3.094546

C -1.454166 -1.941674 1.588667

C 1.886830 2.487300 1.526126

C 1.886830 2.487300 -1.526126

C 1.552338 -2.091043 -1.710623

C 0.025078 0.104759 -3.094546

C -2.894093 1.205245 1.451299

C -2.894093 1.205245 -1.451299

O 3.844771 -0.432833 0.000000

O -2.359047 -2.674997 -1.798292

O -0.913148 3.561320 0.000000

O 2.338971 -2.936384 1.958439

O -0.020658 0.683627 4.123202

O -2.359047 -2.674997 1.798292

O 2.302662 3.134708 2.412916

O 2.302662 3.134708 -2.412916

O 2.338971 -2.936384 -1.958439

O -0.020658 0.683627 -4.123202

O -3.633263 1.475848 2.329139

O -3.633263 1.475848 -2.329139
